1 Modifications to student quarantine policies in K–12 schools implementing multiple COVID-19  
2 prevention strategies restores in-person education without increasing SARS-CoV-2 transmission  
3 risk, January-March 2021

4  
5 Patrick Dawson<sup>1,2</sup> ¶, Mary Claire Worrell<sup>1</sup> ¶, Sara Malone<sup>3</sup>, Stephanie A. Fritz<sup>3</sup>, Heather P.  
6 McLaughlin<sup>1</sup>, Brock K. Montgomery<sup>3</sup>, Mary Boyle<sup>3</sup>, Ashley Gomel<sup>4</sup>, Samantha Hayes<sup>4</sup>, Brett  
7 Maricque<sup>3</sup>, Albert M. Lai<sup>3</sup>, Julie A. Neidich<sup>3</sup>, Sarah C. Tinker<sup>1</sup>, Justin S. Lee<sup>1</sup>, Suxiang Tong<sup>1</sup>,  
8 COVID-19 Response Fieldwork and Laboratory Teams, Rachel C. Orscheln<sup>3</sup>, Rachel Charney<sup>4</sup>,  
9 Terri Rebmann<sup>4</sup>, Missouri School District Data and Coordination Group, Jon Mooney<sup>5</sup>,  
10 Catherine Rains<sup>5</sup>, Nancy Yoon<sup>5</sup>, Machellette Petit<sup>5</sup>, Katie Towns<sup>5</sup>, Clay Goddard<sup>5</sup>, Spring  
11 Schmidt<sup>6</sup>, Lisa C. Barrios<sup>1</sup>, John C. Neatherlin<sup>1</sup>, Johanna S. Salzer<sup>1</sup>, and Jason G. Newland<sup>3</sup>

12  
13  
14 Affiliations

- 15 1. COVID-19 Response Team, Centers for Disease Control and Prevention, Atlanta, GA.  
16 2. Epidemic Intelligence Service, Centers for Disease Control and Prevention, Atlanta, GA  
17 3. Washington University in St. Louis, St. Louis, MO.  
18 4. Saint Louis University, St. Louis, MO.  
19 5. Springfield-Greene County Health Department, Springfield, MO.  
20 6. Saint Louis County Department of Public Health, Berkeley, MO.

21  
22 \*Corresponding Author: Mary Claire Worrell, MPH

23 Email: [yds5@cdc.gov](mailto:yds5@cdc.gov)

24  
25 ¶ These authors contributed equally to the manuscript.

26  
27 ^Membership of the COVID-19 Response Fieldwork and Laboratory Teams and Missouri  
28 School District Data and Coordination Group is provided in the Acknowledgments.

29  
30 Disclaimer: The findings and conclusions in this report are those of the authors and do not  
31 necessarily represent the official position of the Centers for Disease Control and Prevention.

## 32 **Abstract**

33 *Objective:* To determine whether modified K–12 student quarantine policies that allow some  
34 students to continue in-person education during their quarantine period increase schoolwide  
35 SARS-CoV-2 transmission risk following the increase in cases in winter 2020-2021.

36 *Methods:* We conducted a prospective cohort study of COVID-19 cases and exposures among  
37 students and staff (n=65,621) in 103 Missouri public schools. Participants were offered free,  
38 saliva-based RT-PCR testing. An adjusted Cox regression model compared hazard rates of  
39 school-based SARS-CoV-2 infections between schools with a modified versus standard  
40 quarantine policy.

41 *Results:* From January–March 2021, a projected 23 (1%) school-based transmission events  
42 occurred among 1,636 school close contacts. There was no difference in the adjusted hazard rates  
43 of school-based SARS-CoV-2 infections between schools with a modified versus standard  
44 quarantine policy (hazard ratio=1.00; 95% confidence interval: 0.97–1.03).

45 *Discussion:* School-based SARS-CoV-2 transmission was rare in 103 K–12 schools  
46 implementing multiple COVID-19 prevention strategies. Modified student quarantine policies  
47 were not associated with increased school incidence of COVID-19. Modifications to student  
48 quarantine policies may be a useful strategy for K–12 schools to safely reduce disruptions to in-  
49 person education during times of increased COVID-19 community incidence.

## 50 **Introduction**

51 The coronavirus disease 2019 (COVID-19) pandemic substantially impacted the operation of  
52 kindergarten through grade 12 (K–12) schools in the United States, with many schools switching  
53 from in-person instruction to part- or full-time virtual learning during the 2020–2021 school year  
54 (1). Virtual instruction can be an effective learning model for some students, but unequal access  
55 to computers, internet services, and childcare services may put some children at an educational  
56 disadvantage (2). Disruptions to in-person instruction may also affect students beyond  
57 educational attainment, as K–12 schools often provide critical services (e.g., nutritional,  
58 physical, and mental health support) to students and their families (3). Therefore, schools  
59 nationwide have sought strategies to safely operate and maintain in-person learning during the  
60 COVID-19 pandemic.

61  
62 The U.S. Food and Drug Administration (FDA) has authorized the Comirnaty/ Pfizer-BioNTech  
63 COVID-19 Vaccine for use in children ages 5 years and older through an Emergency Use  
64 authorization (ages 5-15 years) and a full authorization for ages 16 and above (4). As of March  
65 14, 2022, 34% of the population 5-11 years and 70% of the population 12-17 years had received  
66 at least one dose of a COVID-19 vaccine (5). Vaccine hesitancy and inequitable access to  
67 vaccine mean not all communities have high coverage of COVID-19 vaccination (6, 7). Thus,  
68 layered prevention strategies continue to be essential to prevent school-based SARS-CoV-2  
69 transmission for K–12 school students when there are increased COVID-19 Community Levels  
70 (8): implementing a universal masking policy, ensuring physical distancing in classrooms,  
71 increasing classroom ventilation with outdoor air, screening testing, having a robust case  
72 identification and contact tracing system, and following local isolation and quarantine guidance

73 (9). Under a standard quarantine policy, students typically must forfeit all in-person activities  
74 including in-person instruction for 7–14 days after their last exposure (10).

75  
76 However, some schools have implemented modifications to standard quarantine guidance to  
77 minimize disruptions to in-person learning for students if the exposure is deemed low risk. In  
78 Greene County, Missouri, K–12 schools implemented a modified quarantine policy permitting  
79 student close contacts of a person having COVID-19 to attend school in person during their  
80 quarantine period if: they were aged  $\leq 18$  years, their only exposure was in a classroom, they did  
81 not have direct physical contact for  $\geq 15$  minutes in one 24-hour period with the person having  
82 COVID-19, and both the student close contact and the person having COVID-19 had worn  
83 masks appropriately during the exposure event (11). In a two-week investigation in Greene  
84 County in December 2020, an estimated 240 days of in-person instruction were saved for 30  
85 students participating in the modified quarantine (12). Additionally, none of the students  
86 participating in the modified quarantine were identified as having a SARS-CoV-2 infection  
87 during the 14 days following exposure through testing or symptom monitoring (12).

88  
89 Layered COVID-19 prevention strategies in K–12 schools can limit school-based SARS-CoV-2  
90 transmission despite concurrent high community incidence (9, 12-15), unless there are lapses in  
91 implementation or adherence (16, 17). However, the effect of individual prevention strategies on  
92 school-based transmission has not been thoroughly assessed in previous reports. Furthermore,  
93 less is known about the impact that modifications to quarantine policies have on school-based  
94 transmission risk and schoolwide COVID-19 incidence.

95

96 To better understand the effects of COVID-19 prevention strategies and modifications to  
97 quarantine policies on school-based SARS-CoV-2 transmission, we conducted a two-month  
98 investigation in Missouri public schools. The objectives were to 1) measure the frequency of  
99 school-based SARS-CoV-2 transmission; 2) quantify the relative risks of school-based  
100 transmission among schoolwide COVID-19 policies; and 3) compare the schoolwide incidence  
101 between schools implementing a modified quarantine and schools following standard quarantine.

102

## 103 **Methods**

104 During January 25–March 21, 2021, we worked with school officials in 103 schools across six  
105 Missouri public school districts in Greene County (57 schools; districts A–C) and St. Louis  
106 County (46 schools; districts D–F), with an estimated 65,621 students and staff (S1 Table).  
107 During the investigation, districts A–C schools had implemented a modified quarantine policy  
108 while districts D–F schools followed standard quarantine (11, 18, 19). The project was reviewed  
109 and approved by the Washington University in St. Louis Institutional Review Board and  
110 conducted consistent with applicable federal law and U.S. Centers for Disease Control and  
111 Prevention (CDC) policy (45 C.F.R. part 46, 21 C.F.R. part 56; 42 U.S.C. Sect. 241(d); 5 U.S.C.  
112 Sect. 552a; 44 U.S.C. Sect. 3501 et seq.).

113

114 School officials were notified of students and staff members who received a positive SARS-  
115 CoV-2 nucleic acid amplification test (NAAT) or antigen test, typically  $\leq 2$  days after the  
116 laboratory result. For persons having COVID-19 who had been physically present in school, at a  
117 school-associated event (e.g., school athletics, extracurricular activities), or on a school bus  
118 while potentially infectious (starting two days before symptom onset or collection of their first

119 positive test specimen), school officials conducted contact tracing to identify their school-based  
120 close contacts. A close contact was defined as someone who was  $\leq 6$  feet away from a person  
121 with COVID-19 for  $\geq 15$  minutes in one 24-hour period. In districts A–C, school officials  
122 determined if student close contacts (hereafter, contacts) met criteria for a modified quarantine.  
123 School officials followed everyone through completion of their isolation or quarantine period,  
124 including whether contacts received a positive NAAT or antigen test.

125  
126 After the school case notification and contact tracing is completed, we asked eligible individuals  
127 to participate in an enhanced investigation consisting of a telephone interview and free saliva-  
128 based testing. Persons with COVID-19 were eligible for the enhanced investigation if they had  
129 been physically present in school, at a school-associated event, or on a school bus while  
130 potentially infectious within 14 days of recruitment by the investigation team; contacts were  
131 eligible if their most recent school-based exposure was within 14 days of recruitment. Contacts  
132 were ineligible if they lived with the person with COVID-19 from the school-based exposure.  
133 Participants provided oral agreement to participate, and parents/guardians provided oral  
134 agreement for children aged  $< 18$  years.

135  
136 For the enhanced investigation, a trained interviewer conducted a standardized telephone  
137 interview addressing clinical symptoms; school, community, and household exposures; and  
138 demographics. For children aged 12–17 years, a parent/guardian and/or the child was  
139 interviewed; for children aged  $< 12$  years, only a parent/guardian was interviewed. Upon  
140 completion of their quarantine period, participating contacts were reinterviewed about  
141 symptoms, additional exposures and activities, and SARS-CoV-2 testing. Saliva specimens were

142 collected from persons with COVID-19 soon after recruitment and from contacts 5–14 days after  
143 their last school-based exposure. Specimens were tested for SARS-CoV-2 by real-time reverse  
144 transcription polymerase chain reaction (RT-PCR) as previously described.(12) Full genome  
145 sequences were generated from RT-PCR–positive saliva specimens at CDC (20).

146  
147 For each school-based contact who received a positive test result from the enhanced  
148 investigation or elsewhere reported to school officials, we conducted a case determination  
149 process to assess the likelihood of the infection being from school-based transmission. Infections  
150 were classified as probable, possible, or unlikely school-based transmission using epidemiologic  
151 and sequencing data from case-contact pairs. School-based transmission was considered unlikely  
152 if the close contact lived in the same household as another person with COVID-19  $\leq 14$  days  
153 before symptom onset or date of collection of their first positive specimen; their exposure,  
154 symptom, or testing timeline was not consistent with the known epidemiology of COVID-19; or  
155 the sequence generated from their specimen had  $>5$  single nucleotide polymorphisms (SNPs)  
156 compared to the sequence generated from their school-based index case’s specimen. School-  
157 based transmission was considered possible if the close contact had non-household community  
158 exposure to a person with COVID-19  $\leq 14$  days before symptom onset or date of collection of  
159 their first positive specimen and was considered probable if their only identified close contact  
160 was with the school-based person with COVID-19. If the sequence generated from the close  
161 contact’s specimen had  $\leq 5$  SNPs compared to the sequence generated from their school-based  
162 index case’s specimen, it was classified as probable school-based transmission. Classifications  
163 were made by at least two members of the investigation team. Discordant classifications were

164 resolved by group discussion with at least one additional team member. In the absence of these  
165 data, classification defaulted to probable.

166  
167 Data on school- and district-level student enrollment, staffing, demographics, and COVID-19  
168 prevention measures were collected from school officials using a standardized survey. All  
169 contact tracing data from school officials were collected in Microsoft Excel and entered into a  
170 REDCap database (hosted by Washington University in St. Louis; version 9.5.5) along with data  
171 from the enhanced investigation. Data were cleaned and analyzed using R (R Core Team;  
172 version 3.6.1) and SAS (SAS Institute; version 9.4).

173  
174 Descriptive analyses were conducted and two-sided tests for statistical significance were  
175 measured using Fisher's exact test where appropriate. Relative risks of school-based SARS-  
176 CoV-2 transmission by schoolwide COVID-19 policies were computed using log-binomial  
177 regression and accounted for school-level cluster-correlated observations using generalized  
178 estimating equations with an independent correlation matrix. Adjusted models included a  
179 variable indicating whether the contact was a student or a staff member.

180  
181 The percentage of asymptomatic contacts we tested who received a positive test result was  
182 extrapolated to contacts who were never tested to project the total number of cases (contacts who  
183 did not receive testing were presumed to be asymptomatic). Schoolwide COVID-19 crude  
184 incidence rates and Cox proportional hazard rates (using observed and projected total case  
185 numbers) were compared between schools with a modified versus standard quarantine policy.  
186 The approximate number of students and staff at each school whose attendance was 100% virtual



187 or had COVID-19  $\leq 90$  days before the start of the study were subtracted from the denominator.  
188 Those presumed to have been infected outside of school were censored at the day of their  
189 positive test specimen collection. Hazard ratios were adjusted for potential school-level  
190 confounding factors: quartiles of the percentage of students eligible to receive free or reduced-  
191 price lunch (as a proxy for school resources) and the school's total number of persons with  
192 COVID-19 that attended school or a school-related event during the study period.

193

## 194 **Results**

195 Of 103 participating schools, COVID-19 prevention strategy survey data were available for 100  
196 (97%). S1 Fig describes the mitigation strategies being utilized in the schools. Virtual instruction  
197 was offered by 92% of schools, universal masking policies (face masks required for all students,  
198 teachers, staff, and visitors on school grounds) were implemented in 97% of schools, 94% of  
199 schools reported efforts to increase ventilation in classrooms, and desks were spaced at least  
200 three feet apart in all classrooms in 84% of schools.

201

202 From January 25 to March 21, 2021, a total of 1,864 students, teachers, and staff were identified  
203 by school officials through case identification and contact tracing, including 228 eligible persons  
204 with COVID-19 and 1,636 contacts (Table 1). Among contacts, 16 (1%) had two school-based  
205 exposures within the same 14-day window and 12 (1%) had a second school-based exposure  
206 after completion of their first quarantine period. Eligible cases and contacts were identified at 68  
207 (66%) schools. The median number of contacts identified per school index person with COVID-  
208 19 was 6 (interquartile range, 2–11).

209

210 **Table 1. Characteristics of school-based persons with index cases of COVID-19 and close**  
 211 **contacts from 103 K–12 schools, Greene and St. Louis Counties, Missouri, January 25–**  
 212 **March 21, 2021.**

|                                                 | <b>Persons</b>        |                    |                    |
|-------------------------------------------------|-----------------------|--------------------|--------------------|
|                                                 | <b>with index</b>     |                    |                    |
|                                                 | <b>case of</b>        | <b>Close</b>       |                    |
|                                                 | <b>COVID-19</b>       | <b>contacts</b>    | <b>Total</b>       |
|                                                 | <b>(N = 228)</b>      | <b>(N = 1,636)</b> | <b>(N = 1,864)</b> |
|                                                 | <b>Median (Range)</b> |                    |                    |
| <b>Age of students, years*</b>                  | 13 (5–18)             | 13 (4–18)          | 13 (4–18)          |
| <b>Age of teachers/staff, years<sup>†</sup></b> | 38 (22–58)            | 42 (21–64)         | 40 (21–64)         |
|                                                 | <b>N (%)</b>          |                    |                    |
| <b>School location</b>                          |                       |                    |                    |
| Greene County                                   | 90 (39)               | 671 (41)           | 761 (41)           |
| District A                                      | 60 (26)               | 485 (30)           | 545 (29)           |
| District B                                      | 14 (6)                | 92 (6)             | 106 (6)            |
| District C                                      | 16 (7)                | 94 (6)             | 110 (6)            |
| St. Louis County                                | 138 (61)              | 965 (59)           | 1,103 (59)         |
| District D                                      | 100 (44)              | 719 (44)           | 819 (44)           |
| District E                                      | 31 (14)               | 183 (11)           | 214 (11)           |
| District F                                      | 7 (3)                 | 63 (4)             | 70 (4)             |
| <b>School role<sup>‡</sup></b>                  |                       |                    |                    |
| Student                                         | 163 (71)              | 1,553 (95)         | 1,716 (92)         |

|                                           |          |          |            |
|-------------------------------------------|----------|----------|------------|
| Elementary grade (grades K–5)             | 49 (21)  | 492 (30) | 541 (29)   |
| Middle school grade (grades 6–8)          | 41 (18)  | 387 (24) | 428 (23)   |
| High school grade (grades 9–12)           | 73 (32)  | 632 (39) | 705 (38)   |
| Staff                                     | 47 (21)  | 83 (5)   | 130 (7)    |
| Teacher                                   | 20 (9)   | 40 (2)   | 60 (3)     |
| Non-teaching staff                        | 27 (12)  | 43 (3)   | 70 (4)     |
| <b>Gender</b>                             |          |          |            |
| Female                                    | 80 (35)  | 360 (22) | 440 (24)   |
| Male                                      | 48 (21)  | 345 (21) | 393 (21)   |
| Transgender, non-binary, or other gender  | 0 (–)    | 5 (<1)   | 5 (<1)     |
| Unknown                                   | 100 (44) | 926 (57) | 1,026 (55) |
| <b>Race</b>                               |          |          |            |
| American Indian or Alaska Native          | 0 (–)    | 1 (<1)   | 1 (<1)     |
| Asian                                     | 0 (–)    | 32 (2)   | 32 (2)     |
| Black or African American                 | 3 (1)    | 97 (6)   | 100 (5)    |
| Native Hawaiian or Other Pacific Islander | 0 (–)    | 4 (<1)   | 4 (<1)     |
| White                                     | 117 (51) | 515 (31) | 632 (34)   |
| Multiracial                               | 8 (4)    | 35 (2)   | 43 (2)     |
| Prefer not to say or unknown              | 100 (44) | 952 (58) | 1,052 (56) |
| <b>Ethnicity</b>                          |          |          |            |
| Hispanic/Latino                           | 5 (2)    | 54 (3)   | 59 (3)     |
| Non-Hispanic/Latino                       | 123 (54) | 648 (40) | 771 (41)   |
| Prefer not to say or unknown              | 100 (44) | 934 (57) | 1,034 (55) |

### Preexisting medical conditions<sup>§</sup>

|         |          |          |            |
|---------|----------|----------|------------|
| Yes     | 34 (15)  | 145 (9)  | 179 (10)   |
| No      | 87 (38)  | 528 (32) | 615 (33)   |
| Unknown | 107 (47) | 963 (59) | 1,070 (57) |

213 Abbreviations: COVID-19 = coronavirus disease 2019; K–12 = kindergarten through grade 12

214 \* Among students, age was unknown for 64 (39%) cases and 897 (58%) contacts.

215 † Among teachers and staff, age was unknown for 18 (38%) cases and 36 (43%) contacts.

216 ‡ For 18 cases, school role is unknown. For 42 student contacts enrolled in K–8 intermediate  
217 schools, grade is unknown.

218 § Preexisting medical conditions included, but were not limited to, type 1 or type 2 diabetes,  
219 hypertension, cardiovascular disease, chronic renal disease, chronic lung disease,  
220 immunosuppressive conditions, autoimmune conditions, and premature birth.

221  
222 Of 1,636 contacts, 496 (30%) were tested for SARS-CoV-2, and 14 (3% of tested; 1% overall)  
223 received a positive test result. Among tested contacts, we tested 372 (75%) and 124 (25%) were  
224 tested elsewhere. Case determinations for the 14 contacts with a positive test result classified 11  
225 as resulting from probable school-based transmission, one as possible, and two as unlikely. For  
226 subsequent analyses, probable and possible were combined for a total of 12 school-based  
227 transmission events. Six contacts who received a positive test result had paired whole genome  
228 sequencing data with their school-based index case, which confirmed epidemiologic linkages for  
229 four (67%; all identical or nearly identical sequences) and ruled out epidemiologic linkages for  
230 two (33%; classified as unlikely). One pair's sequences, both assigned to the B.1.2 lineage,  
231 differed by 15 single nucleotide polymorphisms (SNPs). The other pair's sequences, assigned to

232 lineages B.1.2 and B.1.1.416, differed by 35 SNPs. The 12 school-based transmission events  
233 were generated by 11 school index cases (5%) in 10 different schools; a cluster in one school  
234 involved a transmission chain with one primary, one secondary, and two tertiary cases (Table 2).

235

236

237

238

239 **Table 2.** Characteristics of school-based persons with index cases of COVID-19 and close contacts who received a positive SARS-  
 240 CoV-2 test result from K–12 schools, Greene and St. Louis Counties, Missouri, January 25–March 21, 2021.

| <b>Transmission event</b> | <b>School district</b> | <b>School type*</b> | <b>Person with index case of COVID-19</b>                                                                                          | <b>Close contact with positive SARS-CoV-2 test</b>                                                                                                                                                     |
|---------------------------|------------------------|---------------------|------------------------------------------------------------------------------------------------------------------------------------|--------------------------------------------------------------------------------------------------------------------------------------------------------------------------------------------------------|
| N/A†                      | A                      | Elementary school   | <ul style="list-style-type: none"> <li>• Staff</li> <li>• Symptomatic 4d before exposure event‡</li> <li>• 34 contacts</li> </ul>  | <ul style="list-style-type: none"> <li>• Student</li> <li>• Standard quarantine</li> <li>• Classroom exposure (testing session)</li> <li>• Unlikely school-based transmission + sequencing§</li> </ul> |
| 1                         | A                      | Middle school       | <ul style="list-style-type: none"> <li>• Student</li> <li>• Symptomatic 24h after exposure event</li> <li>• 20 contacts</li> </ul> | <ul style="list-style-type: none"> <li>• Student</li> <li>• Modified quarantine</li> <li>• Classroom exposure</li> <li>• Probable school-based transmission</li> </ul>                                 |
| 2                         | A                      | Intermediate school | <ul style="list-style-type: none"> <li>• Student</li> <li>• Symptomatic 7d before exposure event</li> <li>• 20 contacts</li> </ul> | <ul style="list-style-type: none"> <li>• Student</li> <li>• Modified quarantine</li> <li>• Classroom exposure</li> <li>• Probable school-based transmission</li> </ul>                                 |

|     |   |                   |                                                                                                                                   |                                                                                                                                                                                        |
|-----|---|-------------------|-----------------------------------------------------------------------------------------------------------------------------------|----------------------------------------------------------------------------------------------------------------------------------------------------------------------------------------|
| 3   | B | Middle school     | <ul style="list-style-type: none"> <li>• Student</li> <li>• Symptomatic 6d before exposure event</li> <li>• 6 contacts</li> </ul> | <ul style="list-style-type: none"> <li>• Student</li> <li>• Modified quarantine</li> <li>• Classroom exposure</li> <li>• Probable school-based transmission</li> </ul>                 |
| N/A | C | Elementary school | <ul style="list-style-type: none"> <li>• Student</li> <li>• Symptomatic day of exposure event</li> <li>• 15 contacts</li> </ul>   | <ul style="list-style-type: none"> <li>• Student</li> <li>• Modified quarantine</li> <li>• Classroom exposure</li> <li>• Unlikely school-based transmission + sequencing</li> </ul>    |
| 4   | C | High school       | <ul style="list-style-type: none"> <li>• Staff</li> <li>• Symptomatic 24h after exposure event</li> <li>• 2 contacts</li> </ul>   | <ul style="list-style-type: none"> <li>• Staff</li> <li>• Standard quarantine</li> <li>• School kitchen exposure</li> <li>• Probable school-based transmission + sequencing</li> </ul> |
| 5   | D | Elementary school | <ul style="list-style-type: none"> <li>• Staff</li> <li>• Unknown symptom status</li> <li>• 2 contacts</li> </ul>                 | <ul style="list-style-type: none"> <li>• Staff</li> <li>• Standard quarantine</li> <li>• Exposure circumstances unknown</li> <li>• Probable school-based transmission</li> </ul>       |

|   |   |               |                                                                                                                                   |                                                                                                                                                                                             |
|---|---|---------------|-----------------------------------------------------------------------------------------------------------------------------------|---------------------------------------------------------------------------------------------------------------------------------------------------------------------------------------------|
| 6 | D | Middle school | <ul style="list-style-type: none"> <li>• Student</li> <li>• Unknown symptom status</li> <li>• 6 contacts</li> </ul>               | <ul style="list-style-type: none"> <li>• Student</li> <li>• Standard quarantine</li> <li>• Exposure circumstances unknown</li> <li>• Probable school-based transmission</li> </ul>          |
| 7 | D | High school   | <ul style="list-style-type: none"> <li>• Student</li> <li>• Symptomatic 48h after exposure event</li> <li>• 4 contacts</li> </ul> | <ul style="list-style-type: none"> <li>• Student</li> <li>• Standard quarantine</li> <li>• Classroom exposure + community exposure</li> <li>• Possible school-based transmission</li> </ul> |
| 8 | D | High school   | <ul style="list-style-type: none"> <li>• Unknown role</li> <li>• Unknown symptom status</li> <li>• Unknown # contacts</li> </ul>  | <ul style="list-style-type: none"> <li>• Student</li> <li>• Standard quarantine</li> <li>• Exposure circumstances unknown</li> <li>• Probable school-based transmission</li> </ul>          |
| 9 | D | High school   | <ul style="list-style-type: none"> <li>• Student</li> <li>• Symptomatic day of exposure event</li> <li>• 11 contacts</li> </ul>   | <ul style="list-style-type: none"> <li>• Student</li> <li>• Standard quarantine</li> <li>• Exposure circumstances unknown</li> <li>• Probable school-based transmission</li> </ul>          |



|                     |   |                   |                                                                                                                                             |                                                                                                                                                                                                                                                                                                                                                                               |
|---------------------|---|-------------------|---------------------------------------------------------------------------------------------------------------------------------------------|-------------------------------------------------------------------------------------------------------------------------------------------------------------------------------------------------------------------------------------------------------------------------------------------------------------------------------------------------------------------------------|
| 10‡                 | F | Elementary school | <ul style="list-style-type: none"> <li>• Staff</li> <li>• Symptomatic day of exposure event</li> <li>• 2 contacts</li> </ul>                | <ul style="list-style-type: none"> <li>• Teacher</li> <li>• Standard quarantine</li> <li>• Unclear exposure location (the staff member's office is located next to the teacher's classroom)</li> <li>• Probable school-based transmission + sequencing</li> </ul>                                                                                                             |
| 11–12 <sup>  </sup> | F | Elementary school | <ul style="list-style-type: none"> <li>• Teacher</li> <li>• Symptomatic day of exposure event<sup>†</sup></li> <li>• 28 contacts</li> </ul> | <ul style="list-style-type: none"> <li>• Student</li> <li>• Standard quarantine</li> <li>• Classroom exposure</li> <li>• Probable school-based transmission + sequencing</li> </ul> <hr/> <ul style="list-style-type: none"> <li>• Student</li> <li>• Standard quarantine</li> <li>• Classroom exposure</li> <li>• Probable school-based transmission + sequencing</li> </ul> |

241 Abbreviations: COVID-19 = coronavirus disease 2019; d = days; h = hours; K–12 = kindergarten through grade 12

242 \* School types are elementary school (grades K–5), middle school (grades 6–8), intermediate school (grades K–8), and high school  
 243 (grades 9–12).

244 † The close contact received a positive SARS-CoV-2 test result, but school-based transmission was determined to be unlikely.

245 ‡ Symptom onset dates may reflect a person’s retrospective recognition of earlier minor symptoms prior to development of more  
246 noticeable symptoms that prompted testing and/or their diagnosis of COVID-19. Therefore, some people may have continued to attend  
247 school without considering themselves as having symptoms of COVID-19 until after their diagnosis.

248 § Epidemiologic data supported by sequencing results (identical or nearly identical sequences with  $\leq 5$  single nucleotide  
249 polymorphisms (SNPs) between the specimens from the close contact and school-based person with index case of COVID-19  
250 supported probable school-based transmission; sequences with  $> 5$  SNPs supported unlikely school-based transmission).

251 ¶ Transmission events 10, 11, and 12 are hypothesized to be part of a single transmission chain at the same school, with a primary case  
252 generating a secondary case (event 10), and the secondary case generating two tertiary cases (events 11 and 12).

253 ¶¶ The teacher became symptomatic before learning of their exposure to the staff member having COVID-19 in transmission event 10.

254

255

256

257

258

259

260 Of 307 contacts we tested who reported no symptoms during the 14 days after their school-based  
261 exposure, 3 (1%) were positive. Therefore, among 1,140 contacts with no reported test results, a  
262 projected 11 additional asymptomatic infections may have occurred for a projected total of 23  
263 (1%) school-based transmission events.

264

265 Unadjusted and adjusted relative risks of school-based SARS-CoV-2 infection among school  
266 contacts by schoolwide COVID-19 policy were statistically underpowered, primarily due to the  
267 low number of observed school-based infections and the homogeneity of prevention strategies  
268 implemented by schools (S2 Table).

269

270 In schools with a modified quarantine policy, 336 (49%) of 681 contacts were eligible for  
271 modified quarantine. Among 345 contacts who school officials deemed ineligible for modified  
272 quarantine, 29 were not eligible because they were not students. The primary reasons cited for  
273 ineligibility among 316 students include exposure during lunch (n=143; 45%), unmasked  
274 exposure (n=103; 33%), exposure during athletic activities (n=64; 20%), and prolonged direct  
275 contact (n=34; 11%); multiple reasons were cited for some students (Fig 1).

276

277 **Fig 1. Primary reasons close contacts of persons with COVID-19 (n=345) were deemed**  
278 **ineligible for modified quarantine by K–12 school officials, Greene County, Missouri,**  
279 **January 25–March 21, 2021.** Abbreviations: COVID-19 = coronavirus disease 2019; K–12 = kindergarten  
280 through grade 12

281 Caption: The number inside a rectangle corresponds to the number of close contacts who were deemed ineligible for  
282 a modified quarantine based on the category below the rectangle. Rectangles that overlap two reasons indicate both  
283 reasons were cited in the decision to deem the individual ineligible for a modified quarantine.

284 \*Under Greene County’s modified quarantine policy, only students aged  $\leq 18$  years were eligible for a modified  
285 quarantine.

286 † Prolonged direct contact was defined as direct physical contact with the person having COVID-19 for  $\geq 15$   
287 minutes.

288 ‡ Includes 7 contacts who were also ineligible due to extracurricular activities and 2 contacts who were also  
289 ineligible due to contact outside of school.

290  
291 A total of 66 (20%) students in a modified quarantine had available test results; three students  
292 with positive tests (5% of tested; 1% of all students in modified quarantine) were determined to  
293 have been infected through school-based transmission. All three students discontinued modified  
294 quarantine upon receiving a positive test result to begin isolation. None infected another person  
295 in the school environment; therefore, there was no observed onward transmission from students  
296 in modified quarantine. A projected additional three cases would be expected among the 270  
297 students in modified quarantine without test results for a total of six (2%) transmission events  
298 among students in modified quarantine. A projected additional eight cases would be expected  
299 among the 835 students in standard quarantine without test results for a total of 14 (1%)  
300 transmission events among students in standard quarantine. The difference in frequency of  
301 transmission events between student contacts in modified versus standard quarantine was not  
302 different when comparing observed cases ( $P=0.41$ ) or projected cases ( $P=0.50$ ); thus, students  
303 selected for modified quarantine were no more likely to test positive or develop disease and pose  
304 a risk for onward school-based transmission than students in standard quarantine.

305  
306 Using observed cases, the average crude incidence rate of school-based SARS-CoV-2 infections  
307 was 1.94 per 100,000 per week in schools that implemented a modified quarantine policy and

308 4.00 per 100,000 per week in schools following standard quarantine ( $P=0.24$ ). The adjusted  
309 hazard rates of school-based SARS-CoV-2 infections were not different between schools that  
310 implemented a modified quarantine policy and schools that did not when using observed cases or  
311 total projected cases (for both, hazard ratio, HR=1.00; 95% confidence interval, CI: 0.97–1.03).  
312 The adjusted probability of school-based SARS-CoV-2 infections based on total projected cases  
313 reached a maximum of 0.83% (95% CI: 0.75–0.91%) by the end of the study (Fig 2).

314

315 **Fig 2. Adjusted probability of school-based SARS-CoV-2 infections based on total**  
316 **projected cases (n=23) in schools with and without a modified quarantine policy, Greene**  
317 **and St. Louis Counties, Missouri, January 25–March 21, 2021.**

318 Caption: Top-right inset shows zoomed-in view of adjusted probability curves over the study period. The adjusted\*  
319 probability curve of school-based SARS-CoV-2 infection in schools with a standard quarantine policy is shown by  
320 the teal line; in schools with a modified quarantine policy, it is shown by the dotted black line. The adjusted  
321 probability curves and 95% confidence intervals were the same for schools with and without a modified quarantine  
322 policy.

323 \* The Cox regression model was adjusted for potential school-level confounding factors: quartiles of the percentage  
324 of students eligible to receive free or reduced-price lunch (as a proxy for school resources) and the school's total  
325 number of cases that attended school or a school-related event during the study period.

326

## 327 **Discussion**

328 From January 25 to March 21, 2021, school-based SARS-CoV-2 transmission was rare across  
329 103 Missouri public schools, with a projected total of 23 transmission events. All schools  
330 implemented multiple COVID-19 prevention strategies, such as universal masking policies,  
331 spacing desks three feet apart, increasing ventilation in classrooms, and contact tracing with

332 implementation of quarantine and isolation policies. These measures have been shown to limit  
333 school-based SARS-CoV-2 transmission in some specific settings (9, 12-15), but this report  
334 demonstrates this in urban, suburban, and rural public school districts; in elementary, middle,  
335 and high school grades; in schools that have implemented a modified quarantine and those that  
336 have not; during periods of moderate- to high-community incidence (21, 22); and for a combined  
337 estimated school population of >65,000 students, teachers, and staff. Since this investigation,  
338 there have been two waves of increased incidence of COVID-19 in the U.S. driven by the Delta  
339 and Omicron variants (23, 24). During future times of increased COVID-19 Community  
340 Levels(8), implementation of layered COVID-19 prevention strategies in schools will continue to  
341 play a pivotal role in preventing school-based SARS-CoV-2 transmission.

342  
343 Modifications to student quarantine policies to allow students to continue in-person learning  
344 following a low-risk exposure to a person with COVID-19 at school did not result in onward  
345 SARS-CoV-2 transmission by generation of tertiary cases. These policies also did not result in  
346 increased schoolwide incidence relative to schools that did not implement a modified quarantine  
347 policy, even after adjusting for potential confounding factors. Student close contacts deemed  
348 eligible for modified quarantine were no more likely to receive a positive test result than their  
349 peers in standard quarantine and regained a combined estimated 2,664 days of in-person  
350 schooling (assuming each of the 333 students in modified quarantine who did not test positive  
351 would have missed eight school days if they had not been eligible for modified quarantine),  
352 enough school days for one student to attend kindergarten through their high school graduation.  
353 Other school districts with multiple prevention strategies in place have eliminated quarantine  
354 when masks are reliably used among persons with COVID-19 and their contacts without

355 observing untoward effects (13). Beyond the educational benefits of restoring in-person  
356 learning, consideration of modified quarantine policies should factor in the psychosocial impacts  
357 on students and families.

358  
359 There are several limitations to this report. First, school contact tracing may have not identified  
360 all persons exposed to someone with COVID-19 in a school setting. Second, we did not test all  
361 identified contacts for SARS-CoV-2 following exposure, and therefore the observed number and  
362 incidence of school-based SARS-CoV-2 infections is possibly an underestimation. However,  
363 positive test results outside of the enhanced investigation were reported to school officials and  
364 we projected the number of asymptomatic infections among those without test results to  
365 minimize underestimation. Third, due to low variability in school-level prevention strategies and  
366 the low number of identified school-based transmission events, analyses of the effect of specific  
367 prevention strategies on SARS-CoV-2 transmission were underpowered. Fourth, sequencing data  
368 and interview data were not available for all identified school index case-positive contact pairs,  
369 and in these instances, all persons who received a positive test result during the 14-day window  
370 were presumed to have been infected in school. For the six contacts with a positive test result  
371 who had paired sequencing data, it was determined that two (33%) were not infected from their  
372 school-based index case; it is possible that if sequencing data were available, school-based  
373 transmission may have been ruled out for some of the other contacts with a positive test result.

374

### 375 **Public Health Implications**

376 In this two-month investigation of SARS-CoV-2 transmission in 103 schools implementing  
377 layered COVID-19 prevention strategies and modifications to quarantine policies, school-based

378 SARS-CoV-2 transmission was rare and schools that implemented a modified quarantine policy  
379 did not have greater incidence of school-based SARS-CoV-2 infections. Given these findings  
380 and the benefits of restoring in-person learning for students, schools implementing multiple  
381 COVID-19 prevention strategies might consider adopting a similar policy during times of  
382 increased community incidence. This should be done in conjunction with reinforcement of public  
383 health messaging to promote quarantine adherence outside of school. K–12 schools  
384 implementing universal face mask policies, promoting physical distancing, and increasing  
385 ventilation in classrooms continue to experience low rates of school-based SARS-CoV-2  
386 transmission. As vaccination become available for the majority of the school-aged population  
387 since the completion of this investigation, additional consideration and adaptation to modified  
388 quarantine policies could be considered. Modifications to student quarantine policies may  
389 reduce disruptions to in-person education while maintaining a safe environment for the students  
390 and staff.

## 391 **Supporting information**

### 392 **S1 Table. Characteristics of 103 public K–12 schools participating in SARS-CoV-2** 393 **transmission investigation, Greene and St. Louis Counties, Missouri, January 25–March** 394 **21, 2021**

395 Abbreviations: K–12 = kindergarten through grade 12; NR = not reported

396 Note: Data are from surveys completed by school and district officials unless otherwise noted.

397 \* Data from: <https://dese.mo.gov/school-data>

398 † Includes participating schools only.

399 ‡ Race and ethnicity categories at the school level differed from those collected from individuals as part of the  
400 investigation.

401



402 **S2 Table. Unadjusted and adjusted relative risks of school-based SARS-CoV-2 infection**  
403 **among school close contacts by schoolwide COVID-19 policy in K–12 schools, Greene and**  
404 **St. Louis Counties, Missouri, January 25–March 21, 2021.**

405 Abbreviations: COVID-19 = coronavirus disease 2019; K–12 = kindergarten through grade 12; RR = relative risk;  
406 CI = confidence interval

407 Note: All regression models accounted for cluster-correlated observations at the school level using generalized  
408 estimating equations (GEE) with an independent correlation matrix.

409 \* Regression models were adjusted for school role (student versus staff).

410 † Surveyed ventilation strategies included opening doors when possible, opening windows when possible, using fans  
411 to circulate air, and updating heating, ventilation, and air conditioning (HVAC) systems specifically to prevent  
412 COVID-19.

413  
414

415 **S1 Fig. Schoolwide COVID-19 policies reported in 100 K–12 schools, Greene and St. Louis**  
416 **Counties, Missouri, January 25–March 21, 2021.**

417

418 Abbreviations: COVID-19 = coronavirus disease 2019; HVAC = heating, ventilation, and air conditioning; K–12 =  
419 kindergarten through grade 12

420 \* School buildings also include the areas listed in the subsequent two categories: hallways, stairways, gymnasiums,  
421 cafeterias, and other special use rooms.

## Acknowledgments

All the students, families, educators, nurses, administrators, and staff members from participating schools and school districts in Greene and St. Louis Counties, Missouri; Dr. James Blaine; Pam A. Miller; Dr. Matt Pearce; Dr. Shawn Randles; CDC COVID-19 Response Team (Jennifer Frazier, Elizabeth Haller, Laura Hughes-Baker, Catherine N. Rasberry, Hailey Reid); Jordan Valley Community Health Center (Shelley Hall, Shannel Johnson, Mandy Jones, Jennifer Logan, Dr. Matthew Stinson, Amber Tenorio); Mercy Hospital Springfield and St. Louis; Ozarks Technical Community College (Katelyn Antrim, Dr. Daniela Brink, Alane Cordray, Katherine Ebersole, Chanté Whittle); Saint Louis University (Mary Beal, Adrienne Beckett-Ansa, Janaki Bhave, Allie Bodin, Kajal Dholakia, Andrea Hoppert, Rachel Leimkuehler, Elena Dalleo Locascio, Ruband Mahmood, Rachel L. Mazzara, Margaret O'Brien, Komal Patel, Lydia Thomas, Audrey Yao); Springfield-Greene County Health Department (Sean Barnhill, Jordan Coiner, Brad Stulce, Kathryn Wall); University of Missouri School of Medicine (Hosea Covington, Evan Garrad, Dr. David Haustein, Tricia Haynes, Spencer Blake Price, Wyatt Whitman); 4ES Corporation (Dr. Bre Peeler); and Washington University in St. Louis (Lori Barganier, Caleb Gentry, Ian T. Lackey, Savannah Low, Dr. Suong T. Nguyen, Jenna Rideout, Tejas Sekhar, Cindy Terrill, Cole Tipton).

### **COVID-19 Response Fieldwork and Laboratory Teams**

Thu-ha Dinh, M.D., Catherine V. Donovan, Ph.D., Victoria Foltz, B.S., Jessica L. Halpin, M.S., Sooji Lee, M.S.P.H., Michelle O'Hegarty, Ph.D., Jonathan Steinberg, M.P.H., Elaine Stevens-Emilien, M.S., Shaniece C. Theodore, Ph.D., Caitlin M. Worrell, M.P.H. (COVID-19 School Fieldwork Team, CDC); Yan Li, M.Sc., Ying Tao, Ph.D., Anna Uehara, Ph.D., Jing Zhang,

Ph.D. (COVID-19 Surge Laboratory Group, CDC); Sarah Greene, M.D., Ph.D., Jaimee Hall, D.O., Alex S. Plattner, M.D. (COVID-19 School Fieldwork Team, Washington University in St. Louis).

### **Missouri School District Data and Coordination Group**

Tammy Fitzpatrick, B.S.N., R.N., Mandy Williams, R.N., Logan-Rogersville School District, Rogersville, MO; Amanda Fields, B.S.N., R.N., Tim Pecoraro, Ed.D., Pattonville School District, St. Ann, MO; Natalie Botkin, B.S.N., R.N., Republic School District, Republic, MO; Glenn Hancock, Ed.S., Amy Wehr, B.S.N., R.N., Rockwood School District, Eureka, MO; Jean Grabeel, M.Ed., R.N., Lee Ann Neill, M.S.N., R.N., Springfield Public Schools, Springfield, MO; Kashina Bell, Ed.D., Sharonica Hardin-Bartley, Ph.D., The School District of University City, University City, MO.

## References

1. Honein MA, Barrios LC, Brooks JT. Data and policy to guide opening schools safely to limit the spread of SARS-CoV-2 infection. *JAMA*. 2021;325(9):823-4.
2. Black E, Ferdig R, Thompson LA. K-12 Virtual Schooling, COVID-19, and Student Success. *JAMA Pediatrics*. 2020;175(2):119-20.
3. Masonbrink AR, Hurley E. Advocating for Children During the COVID-19 School Closures. *Pediatrics*. 2020;146(3):e20201440.
4. FDA. COVID-19 Vaccines 2022 [Available from: <https://www.fda.gov/emergency-preparedness-and-response/coronavirus-disease-2019-covid-19/covid-19-vaccines>].
5. Centers for Disease Control and Prevention. Demographic Trends of People Receiving COVID-19 Vaccinations in the United States 2022 [updated 3/5/2022. Available from: <https://covid.cdc.gov/covid-data-tracker/#vaccination-demographics-trends>].
6. Centers for Disease Control and Prevention. Vaccine Hesitancy for COVID-19: County and local estimates 2021 [Available from: <https://data.cdc.gov/Vaccinations/Vaccine-Hesitancy-for-COVID-19-County-and-local-es/q9mh-h2tw>].
7. Centers for Disease Control and Prevention. Increasing COVID-19 Vaccine Uptake among Members of Racial and Ethnic Minority Communities: A Guide for Developing, Implementing, and Monitoring Community-Driven Strategies 2021 [Available from: <https://www.cdc.gov/vaccines/covid-19/downloads/guide-awardees-community-driven-strategies.pdf>].
8. Centers for Disease Control and Prevention. COVID-19 Community Levels 2022 [Available from: <https://www.cdc.gov/coronavirus/2019-ncov/science/community-levels.html>].

9. Centers for Disease Control and Prevention. Operational Strategy for K-12 Schools through Phased Prevention: US Department of Health and Human Services, CDC; 2021 [Available from: <https://www.cdc.gov/coronavirus/2019-ncov/community/schools-childcare/operation-strategy.html>].
10. Centers for Disease Control and Prevention. Science Brief: Options to Reduce Quarantine for Contacts of Persons with SARS-CoV-2 Infection Using Symptom Monitoring and Diagnostic Testing 2020 [Available from: [cdc.gov/coronavirus/2019-ncov/science/science-briefs/scientific-brief-options-to-reduce-quarantine.html](https://www.cdc.gov/coronavirus/2019-ncov/science/science-briefs/scientific-brief-options-to-reduce-quarantine.html)].
11. Springfield-Greene County Health Department. Modified Quarantine 2021 [Available from: <https://www.springfieldmo.gov/5369/Modified-Quarantine>].
12. Dawson P, Worrell MC, Malone S, Tinker SC, Fritz S, Maricque B, et al. Pilot Investigation of SARS-CoV-2 Secondary Transmission in Kindergarten Through Grade 12 Schools Implementing Mitigation Strategies — St. Louis County and City of Springfield, Missouri, December 2020. *Morbidity and Mortality Weekly Report*. 2021;70(12):449-55.
13. Hershov RB, Wu K, Lewis NM, Milne AT, Currie D, Smith AR, et al. Low SARS-CoV-2 Transmission in Elementary Schools — Salt Lake County, Utah, December 3, 2020–January 31, 2021. *Morbidity and Mortality Weekly Report*. 2021;70(12):442-8.
14. Falk A, Benda A, Falk P, Steffen S, Wallace Z, Høeg TB. COVID-19 Cases and Transmission in 17 K–12 Schools — Wood County, Wisconsin, August 31–November 29, 2020. *Morbidity and Mortality Weekly Report*. 2021;70(4):136-40.
15. Macartney K, Quinn HE, Pillsbury AJ, Koirala A, Deng L, Winkler N, et al. Transmission of SARS-CoV-2 in Australian educational settings: a prospective cohort study. *The Lancet Child & Adolescent Health*. 2020;4(11):807-16.

16. Stein-Zamir C, Abramson N, Shoob H, Libal E, Bitan M, Cardash T, et al. A large COVID-19 outbreak in a high school 10 days after schools' reopening, Israel, May 2020. *Euro Surveill*. 2020;25(29):pii=2001352.
17. Gold JAW, Gettings JR, Kimball A, Franklin R, Rivera G, Morris E, et al. Clusters of SARS-CoV-2 Infection Among Elementary School Educators and Students in One School District — Georgia, December 2020–January 2021. *Morbidity and Mortality Weekly Report*. 2021;70(8):289-92.
18. Springfield-Greene County Health Department. Quarantine and Isolation 2021 [Available from: <https://www.springfieldmo.gov/5251/Quarantine-and-Isolation>].
19. St. Louis County Department of Public Health. Home Quarantine Instructions for Close Contacts to People With COVID-19 2021 [Available from: <https://stlouiscountymo.gov/st-louis-county-departments/public-health/covid-19/advisories-safety-recommendations/quarantine/>].
20. Paden CR, Tao Y, Queen K, Zhang J, Li Y, Uehara A, et al. Rapid, sensitive, full-genome sequencing of severe acute respiratory syndrome coronavirus 2. *Emerging Infectious Diseases*. 2020;26(10):2401-5.
21. Springfield-Greene County Health Department. COVID-19 Dashboard: Springfield-Greene County 2021 [Available from: <https://www.springfieldmo.gov/5147/Recovery-Dashboard>].
22. St. Louis County Department of Public Health. COVID-19 Statistics 2021 [Available from: <https://stlcorona.com/resources/covid-19-statistics/>].
23. Centers for Disease Control and Prevention. Trends in Number of COVID-19 Cases and Deaths in the US Reported to CDC, by State/Territory 2022 [Available from: [https://covid.cdc.gov/covid-data-tracker/#trends\\_dailycases](https://covid.cdc.gov/covid-data-tracker/#trends_dailycases)].

24. Centers for Disease Control and Prevention. Variant Proportions 2022 [Available from: <https://covid.cdc.gov/covid-data-tracker/#variant-proportions>].

**Fig 1.** Primary reasons close contacts of persons with COVID-19 (n=345) were deemed ineligible for modified quarantine by K–12 school officials, Greene County, Missouri, January 25–March 21, 2021.

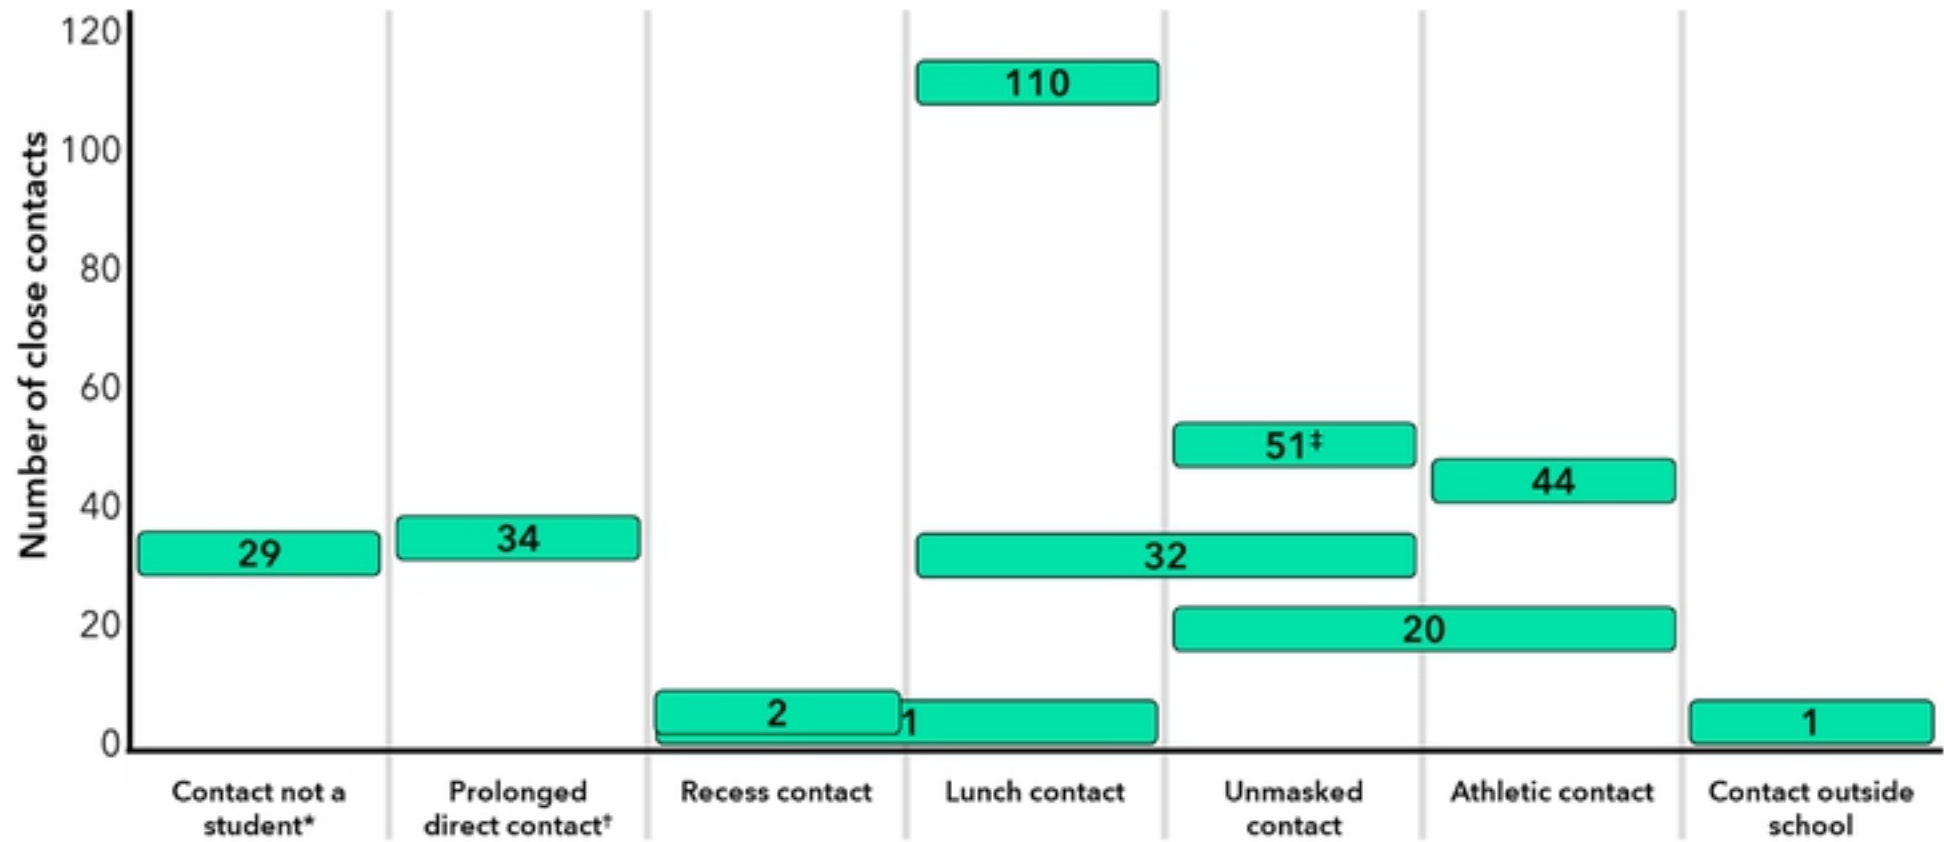

Fig 1



**Fig 2.** Adjusted probability of school-based SARS-CoV-2 infections based on total projected cases (n=23) in schools with and without a modified quarantine policy, Greene and St. Louis Counties, Missouri, January 25–March 21, 2021.

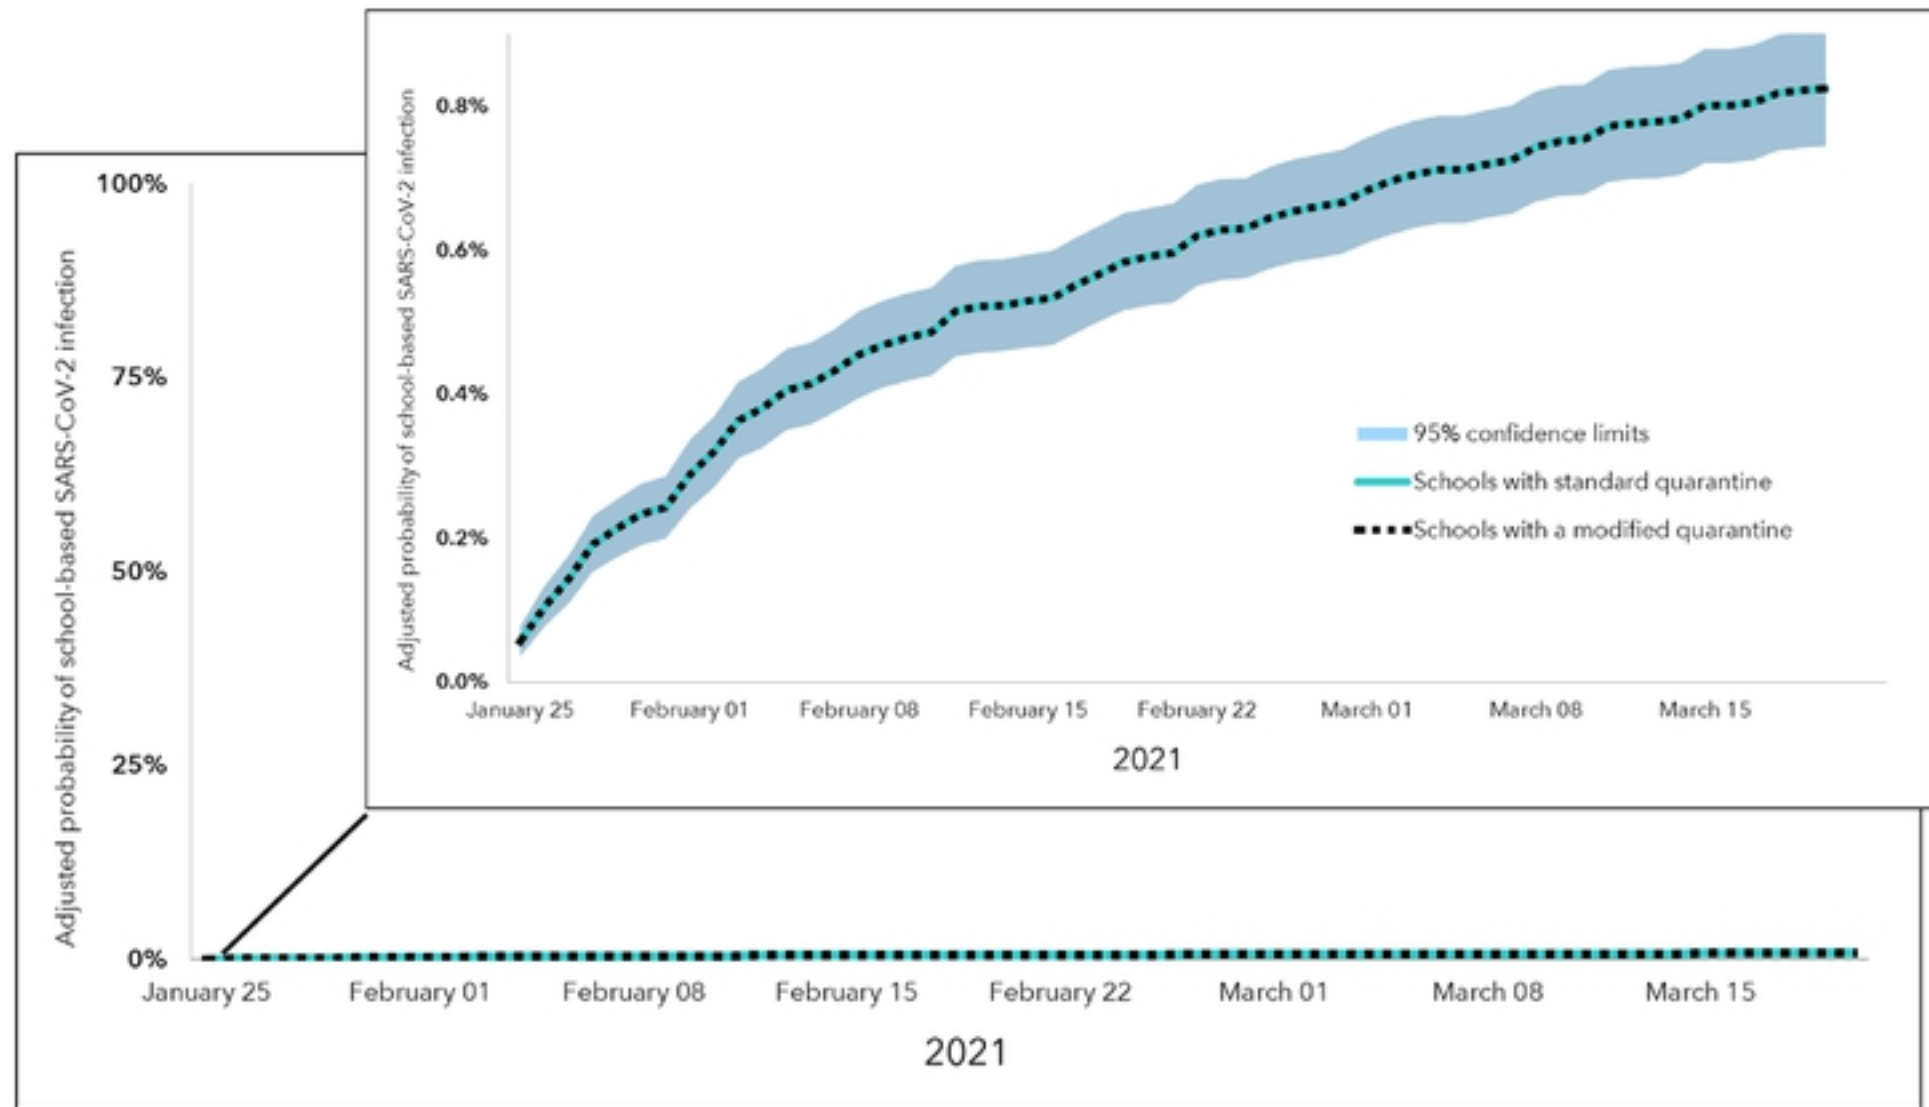

Fig 2
